# Supplementary material for: Effects of Alterations in Resting-State Neural Networks on the Severity of Neuropathic Pain after Spinal Cord Injury
Source: MDPI journal article supplement (doi:10.3390/bioengineering10070860), 2023-07-20
Supplement: s1 [file s1]

Table S1. Demographic and clinical characteristics of the incomplete spinal cord injury patients.

| Patient                  | Sex | Age               | AIS | NLI | VAS               | BDI               |
|--------------------------|-----|-------------------|-----|-----|-------------------|-------------------|
| Mild NP Group            |     |                   |     |     |                   |                   |
| 1                        | M   | 35                | D   | C2  | 25                | 10                |
| 2                        | M   | 44                | D   | T10 | 30                | 32                |
| 3                        | F   | 60                | D   | C4  | 29                | 16                |
| 4                        | F   | 70                | C   | L1  | 30                | 6                 |
| 5                        | F   | 48                | D   | T9  | 20                | 18                |
| 6                        | M   | 29                | D   | C4  | 20                | 6                 |
| 7                        | M   | 46                | C   | C4  | 10                | 26                |
| 8                        | M   | 26                | D   | C8  | 10                | 0                 |
| 9                        | M   | 64                | D   | C2  | 30                | 28                |
| 10                       | M   | 66                | D   | C5  | 20                | 6                 |
| 11                       | F   | 58                | D   | T6  | 20                | 7                 |
| 12                       | F   | 70                | C   | T12 | 10                | 16                |
| 13                       | M   | 29                | C   | C5  | 10                | 9                 |
| 14                       | M   | 33                | C   | L1  | 20                | 10                |
| 15                       | M   | 31                | D   | T10 | 30                | 1                 |
| 16                       | F   | 65                | C   | T5  | 20                | 17                |
| 17                       | F   | 59                | D   | C4  | 20                | 10                |
| 18                       | M   | 54                | D   | T12 | 20                | 25                |
| 19                       | M   | 45                | D   | L1  | 20                | 23                |
| 20                       | M   | 37                | D   | C5  | 30                | 15                |
| 21                       | F   | 68                | D   | L2  | 30                | 3                 |
| 22                       | M   | 63                | D   | C4  | 0                 | 17                |
| 23                       | F   | 58                | D   | T12 | 10                | 16                |
| 24                       | M   | 39                | D   | C5  | 30                | 4                 |
| Mean $\pm$ SD            | -   | 49.87 $\pm$ 14.74 | -   | -   | 20.58 $\pm$ 8.59  | 13.37 $\pm$ 8.85  |
| Moderate-Severe NP Group |     |                   |     |     |                   |                   |
| 25                       | M   | 51                | D   | T10 | 40                | 6                 |
| 26                       | M   | 57                | D   | C5  | 46                | 5                 |
| 27                       | M   | 46                | C   | C4  | 55                | 23                |
| 28                       | F   | 51                | D   | C4  | 82                | 26                |
| 29                       | M   | 42                | C   | C4  | 69                | 9                 |
| 30                       | F   | 69                | D   | C3  | 51                | 22                |
| 31                       | M   | 44                | C   | L3  | 50                | 7                 |
| 32                       | M   | 64                | D   | C2  | 50                | 49                |
| 33                       | M   | 54                | D   | C5  | 40                | 7                 |
| 34                       | M   | 64                | D   | C4  | 40                | 10                |
| 35                       | F   | 53                | D   | T12 | 80                | 6                 |
| 36                       | F   | 69                | D   | C3  | 81                | 20                |
| 37                       | M   | 56                | C   | T11 | 40                | 15                |
| 38                       | M   | 66                | D   | C2  | 60                | 6                 |
| 39                       | M   | 61                | D   | C4  | 50                | 2                 |
| 40                       | M   | 20                | D   | C5  | 40                | 11                |
| 41                       | M   | 48                | C   | T12 | 50                | 28                |
| Mean $\pm$ SD            | -   | 53.82 $\pm$ 12.18 | -   | -   | 54.35 $\pm$ 14.92 | 14.82 $\pm$ 11.99 |

Neuropathic pain, NP; american Spinal Injury Association Impairment scale, AIS; neurologic level of injury, NLI; visual analog scale, VAS; Beck depression inventory, BDI;
